# Supplementary material for: Tolerance to alkaline ambient pH in Aspergillus nidulans depends on the activity of ENA proteins
Source: PubMed Central journal article supplement (PMC7459330; doi:10.1038/s41598-020-71297-z), 2020-08-31
Supplement: 41598_2020_71297_MOESM1_ESM.pdf [file 41598_2020_71297_MOESM1_ESM.pdf]

## Supplementary Information

### **Tolerance to alkaline ambient pH in *Aspergillus nidulans* depends on the activity of ENA proteins.**

Ane Markina-Iñarrairaegui<sup>1</sup>, Anja Spielvogel<sup>2</sup>, Oier Etxebeste<sup>1</sup> (0000-0002-9786-6091),  
Unai Ugalde<sup>1</sup> and Eduardo A. Espeso<sup>2,\*</sup> (0000-0002-5873-6059)

1. Department of Applied Chemistry, Faculty of Chemistry, University of the Basque  
Country, San Sebastian, Spain

2. Department of Cellular and Molecular Medicine, Centro de Investigaciones  
Biológicas Margarita Salas, C.S.I.C., Ramiro de Maeztu, 9, Madrid 28040, Spain

\* Correspondence to: eespeso@cib.csic.es.

Running title: Role of P-type ATPases in alkaline pH response.

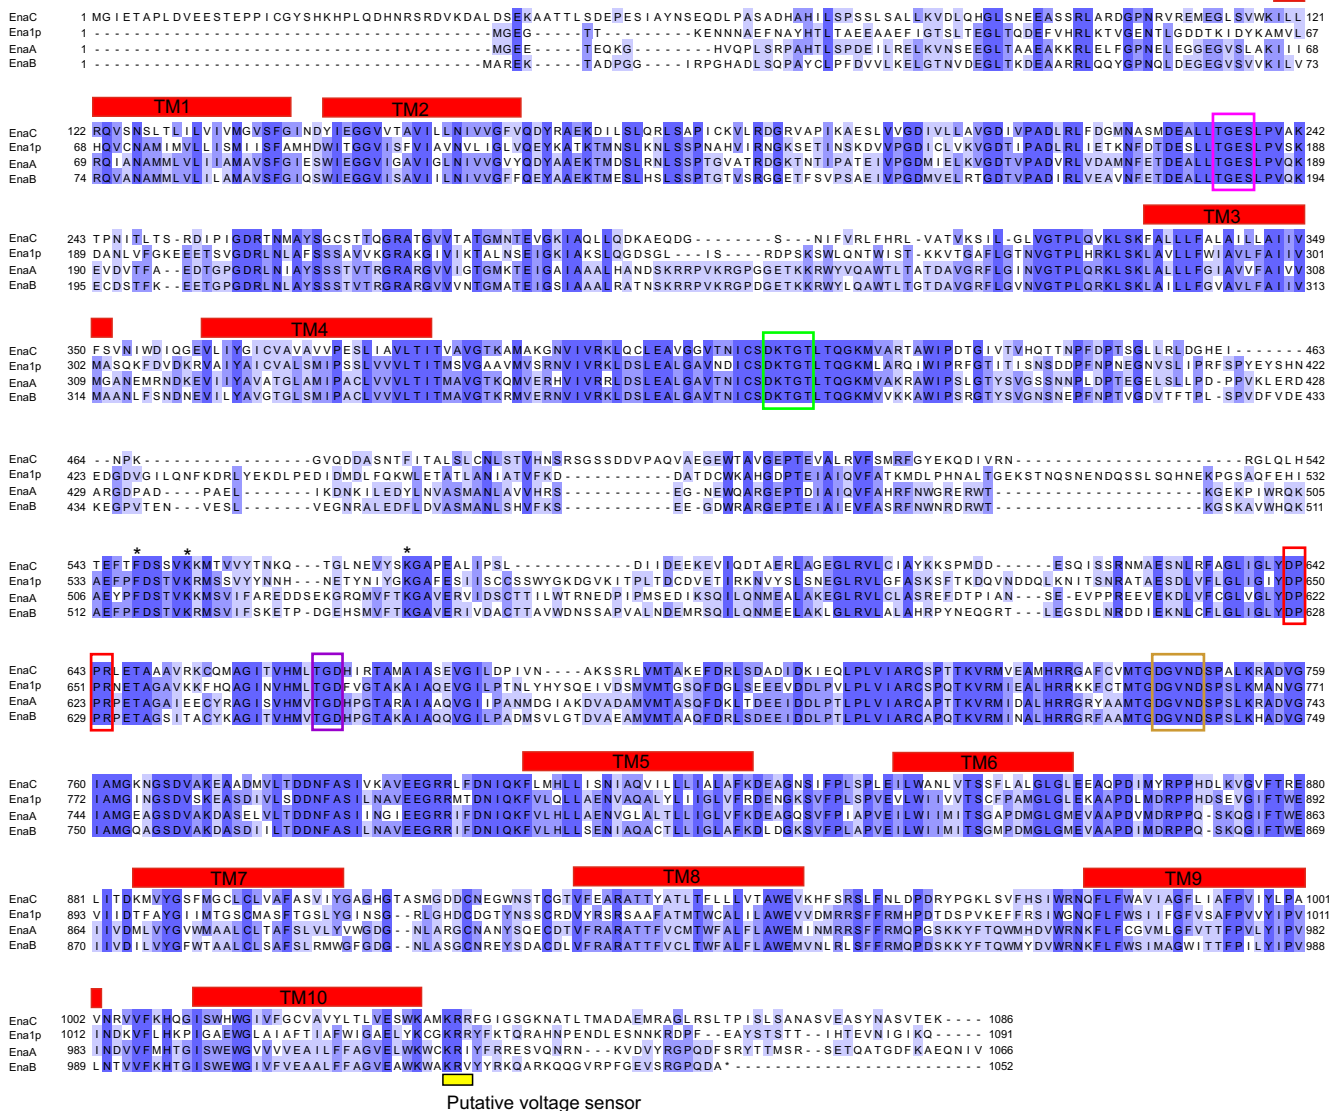

Conserved motifs for ENA proteins, coordinates as in ScEna1p

- TGES<sup>183</sup> (A domain)
- DKTGT<sup>393</sup> (D = Asp residue phosphorylation)
- \* F<sup>537</sup>, K<sup>542</sup>, K<sup>561</sup> (nucleotide binding)
- DPPR<sup>552</sup>
- TGD<sup>875</sup>
- DGVND<sup>761</sup> (Mg<sup>2+</sup> binding domain)

**Supplementary Figure 1. Amino acid sequence analysis of An-ENA like ATPases.** (A) Sequence alignments of *S. cerevisiae* Ena1p and *A. nidulans* predicted full-length ENA ATPases. Clustal method was used for the comparison. Boxes describe conserved functional regions detailed in reference<sup>1</sup> and the red rectangles delimit the position of the putative transmembrane regions predicted with Hidden Markov Models (TMHMM and HMMTOP). Protein accession numbers are reported as follows: *Saccharomyces cerevisiae* Ena1p (NP\_010325), *Aspergillus nidulans* EnaA (CBF71157), EnaB (CBF85251) and EnaC (CBF79858).

**A**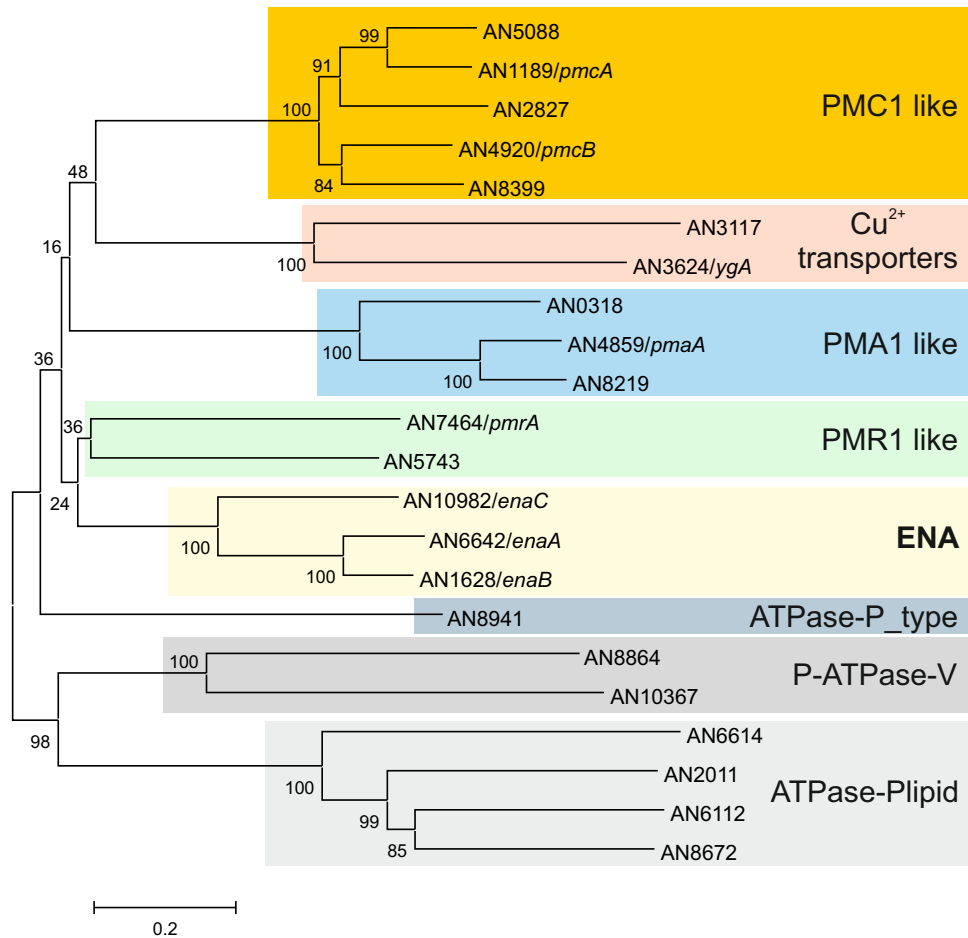**B**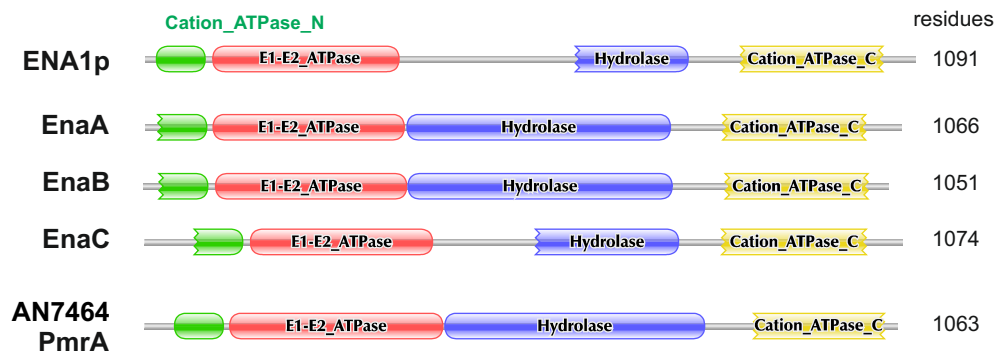

**Supplementary Figure 2. Classification of ATPases in *A. nidulans* and distribution of functional domains. (A)** Phylogenetic tree corresponding to 22 ATPases of *A. nidulans*. The tree was generated using Mega (version 7.0)<sup>2</sup> and the Neighbor-Joining method, with a bootstrap test value of 10,000 replicates. EnaA, EnaB and EnaC group to the same clade of the tree, next to PMR1-like proteins. **(B)** Representation of domain organization and extension of EnaA, EnaB and EnaC according to Pfam, AspGD and FungiDB databases. Colours keyed to cation-ATPase-N (pfam00690) domain (green), E1-E2\_ATPase (pfam00122) domain (red), Hydrolase, haloacid dehalogenase-like hydrolase (HAD) (COG4087. pfam00702) domain (blue), and Cation\_ATPase\_C (pfam00689) domain (yellow).

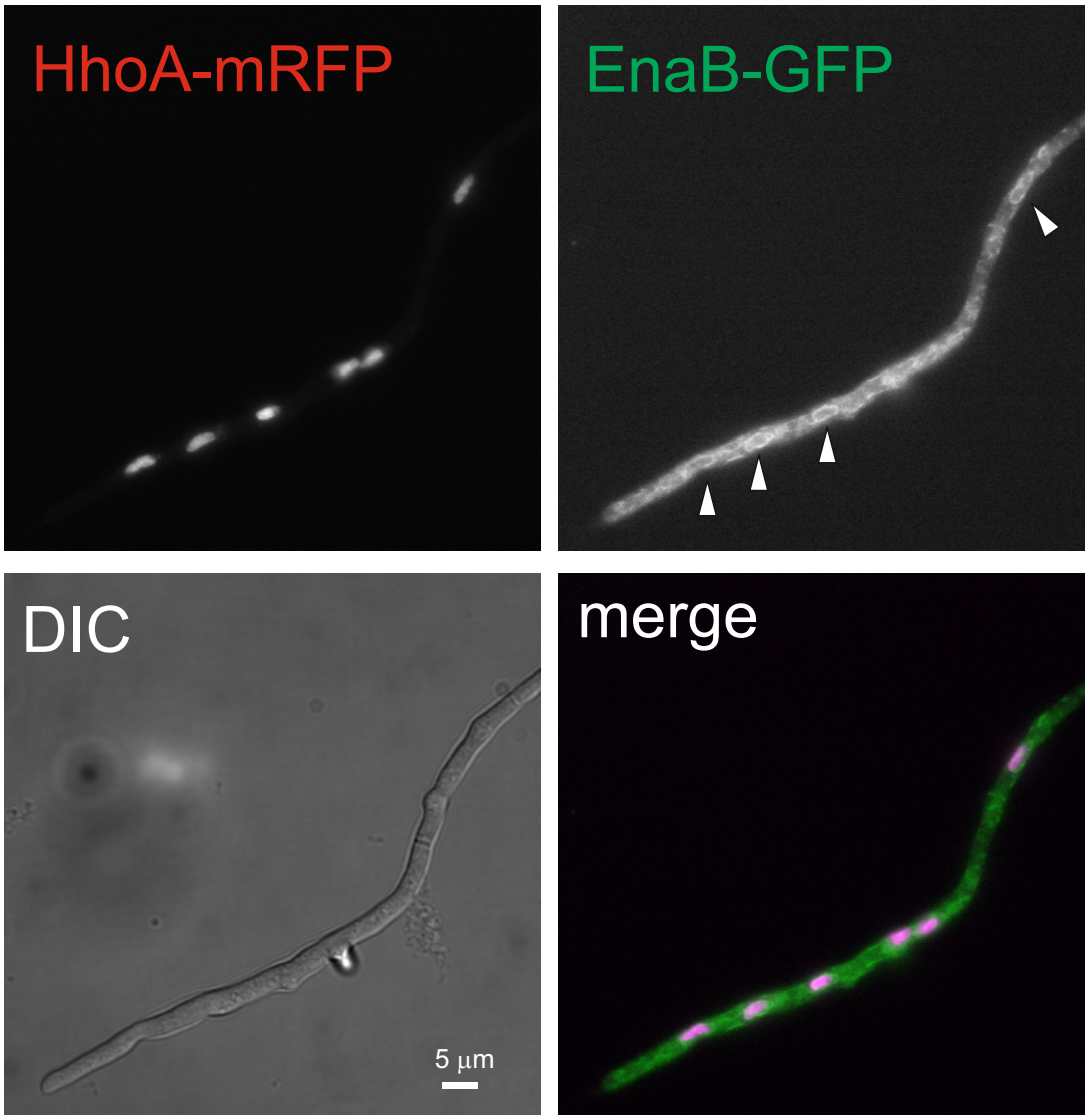

**Supplementary Figure 3. Colocalization of EnaB-GFP and nuclei.** Images showing the localization of EnaB-GFP and histone H1-mRFP in cells of diploid strain DIP5. Red fluorescence channel is shown on top left image showing a hypha with 6 nuclei. Top right is shown the green fluorescence channel (EnaB-GFP) and the ovoid structures are indicated with white arrowheads. Down-right is the merged image of red and green channels (magenta nuclei/histone H1 and green EnaB) showing the localization of EnaB at the periphery of nuclei. Down left is the Nomarsky image of the hypha and the scale bar representing 5  $\mu\text{m}$ .



**Supplementary Table 1. List of *A. nidulans* strains used in this work**

| Strain             | Genotype                                                                                                                                 | Source                |
|--------------------|------------------------------------------------------------------------------------------------------------------------------------------|-----------------------|
| MAD2446            | <i>pyrG89; wA4; inoB2, pyroA4; hho::mCh::pyroA</i><br><i>;(myc)3-pacC(pacC900); veA1</i>                                                 | Madrid's collection   |
| MAD2173            | <i>pyrG89 argB2 pyroA4Dnku::argB</i><br><i>sec63::gfp::pyrGAf,</i>                                                                       | 3                     |
| MAD1425            | <i>pyrG89; argB2; pyroA4, nkuAΔ::argB; veA1</i>                                                                                          | TNO02A3 <sup>4</sup>  |
| MAD1425+<br>/BD377 | <i>pyrG<sup>An</sup>; argB2; pyroA4, nkuAΔ::argB; veA1</i>                                                                               | 5                     |
| MAD1427            | <i>pyrG89, pabaA1; argB2; nkuAΔ::argB; veA1, riboB2</i>                                                                                  | TNO02A25 <sup>4</sup> |
| MAD2732            | <i>pyrG<sup>An</sup>, pabaA1; argB2; nkuAΔ::argB; veA1, riboB2</i>                                                                       | 5                     |
| MAD2731            | <i>pyrG89, pabaA1; argB2; nkuAΔ::argB; veA1, riboB<sup>An</sup></i>                                                                      | 5                     |
| BD604              | <i>pyrG89, enaAΔ::pyrG<sup>Af</sup>; argB2; pyroA4,</i><br><i>nkuAΔ::argB; veA1</i>                                                      | This work             |
| BD487/BER53-<br>B  | <i>pabaA1; argB2; nkuAΔ::argB; enaBΔ::riboB<sup>Af</sup>; veA1,</i><br><i>riboB2</i>                                                     | This work             |
| BD486/BER55-<br>B  | <i>pyrG89, pabaA1; argB2; enaCΔ::pyrG<sup>Af</sup>,</i><br><i>ΔnkuA::argB; veA1, riboB<sup>An</sup></i>                                  | This work             |
| BD488/BER54        | <i>pyrG89, pabaA1, enaAΔ::pyrG<sup>Af</sup>; argB2;</i><br><i>ΔnkuA::argB; enaBΔ::riboB<sup>Af</sup>; veA1, riboB2</i>                   | This work             |
| BD489/BER56        | <i>pyrG89, pabaA1; argB2; enaCΔ::pyrG<sup>Af</sup>,</i><br><i>ΔnkuA::argB; enaBΔ::riboB<sup>Af</sup>; veA1, riboB2</i>                   | This work             |
| BD625              | <i>pyrG89, enaAΔ::pyrG<sup>Af</sup>; argB2; enaCΔ::pyroA<sup>Af</sup>,</i><br><i>pyroA4, nkuAΔ::argB; veA1</i>                           | This work             |
| BD575              | <i>pyrG89, enaAΔ::pyrG<sup>Af</sup>; pyroA4, nkuAΔ::argB;</i><br><i>enaBΔ::riboB<sup>Af</sup>; inoB2; wA4, argB2</i>                     | This work             |
| BD612              | <i>pyrG89, enaAΔ::pyrG<sup>Af</sup>; argB2; enaCΔ::pyrG<sup>Af</sup>,</i><br><i>pyroA4, nkuAΔ::argB; enaBΔ::riboB<sup>Af</sup>; veA1</i> | This work             |
| MAD305             | <i>pabaA1; pacC<sup>14</sup></i>                                                                                                         | Madrid's collection   |
| MAD1074            | <i>inoB2; palH72</i>                                                                                                                     | Madrid's collection   |
| MAD4097<br>/HHF27b | <i>sltAΔ::riboB<sup>f</sup></i>                                                                                                          | 6                     |
| MAD25ED            | <i>pyrG89, enaA::gfp::pyrG<sup>Af</sup>; pyroA4, nkuA::bar</i>                                                                           | This work             |
| MAD26ED            | <i>pyrG89; pyroA4, nkuAΔ::bar; enaB::gfp::pyrG<sup>Af</sup></i>                                                                          | This work             |
| MAD1739            | <i>pyrG<sup>An</sup>; pyroA4, nkuAΔ::bar</i>                                                                                             | Madrid's collection   |
| MAD3042            | <i>pyrG89; pyroA4, nkuAΔ::bar,</i><br><i>[pyroA+::gpdA<sup>mini</sup>::enaA]</i>                                                         | This work             |
| MAD3043            | <i>pyrG89; pyroA4, nkuAΔ::bar,</i><br><i>[pyroA+::gpdA<sup>mini</sup>::enaA]x2</i>                                                       | This work             |
| MAD1865            | <i>pabaA1; pyroA4; inoB2, glrA1, palA1</i>                                                                                               | Madrid's collection   |
| I25                | <i>pabaA1; [pyroA+::gpdA<sup>mini</sup>::enaA]; palA1</i>                                                                                | This work             |
| I4                 | <i>pabaA1; [pyroA+::gpdA<sup>mini</sup>::enaA]x2; palA1</i>                                                                              | This work             |
| DIP5               | <i>pyrG89; pyroA4, nkuAΔ::bar; enaB::gfp::pyrG<sup>Af</sup> /</i>                                                                        | This work             |

|  |                                              |  |
|--|----------------------------------------------|--|
|  | <i>pabaA1, hhoA::mRFP::pyrG<sup>Af</sup></i> |  |
|--|----------------------------------------------|--|

## Supplementary Table 2. Oligonucleotides used in this work

| Name                 | Sequence (5'-3')                                                | Aim                                                             | Source    |
|----------------------|-----------------------------------------------------------------|-----------------------------------------------------------------|-----------|
| EnaA-gsp1            | CGGAAAGACCTTACCATGATTCGC                                        | EnaA 5' UTR                                                     | This work |
| EnaA-gsp2            | CTGACGTTACTACTATGGTGTC                                          | EnaA 5' UTR                                                     | This work |
| EnaA-gsp3            | GCACTCCGACGGAAAGCTTGCTACC                                       | EnaA 3' UTR                                                     | This work |
| EnaA-gsp4            | CAACCACAACCTCGATACTTCGC                                         | EnaA 3' UTR                                                     | This work |
| EnaA-gsp5            | TCTACGATCCGCCTAGGCCTGAGACAG<br>C                                | EnaA 3' end ORF                                                 | This work |
| EnaA-gsp6            | AACGATATTCTGTTCCGCCTTGAAGTC<br>TCC                              | EnaA 3' end ORF                                                 | This work |
| EnaA-gsp2*           | GACACCATAGTAGTAACGTCAGACCGG<br>TCGCCTCAAACAATGCTCT              | pyrG <sup>Af</sup> cassette                                     | This work |
| EnaA-gsp3*           | GGTAGCAAGCTTTCCGTCGGAGTGCGT<br>CTGAGAGGAGGCACTGATGCG            | pyrG <sup>Af</sup> /gfp::pyrG <sup>Af</sup><br>cassette         | This work |
| EnaA-gsp6*           | GGGAGACTTCAAGGCGGAACAGAATAT<br>CGTTGGAGCTGGTGCAGGCGCTGGAGC<br>C | gfp::pyrG <sup>Af</sup> cassette                                | This work |
| EnaB-gsp1            | CAACAACCAGCTCAGCCGTTTGC                                         | EnaB 5' UTR                                                     | This work |
| EnaB-gsp2            | TGACAACCTGAGATGATAAGCCCCG                                       | EnaB 5' UTR                                                     | This work |
| EnaB-gsp3            | CGTCTGCTTTCCCTCGCTTAG                                           | EnaB 3' UTR                                                     | This work |
| EnaB-gsp4            | AGCTAGCCCTCCAAGCCAACAC                                          | EnaB 3' UTR                                                     | This work |
| EnaB-gsp5            | AACTCATCGGCTCCTGTGGC                                            | EnaB 3' end ORF                                                 | This work |
| EnaB-gsp6            | GGCATCCTGAGGGCCCTGCTTACCTC                                      | EnaB 3' end ORF                                                 | This work |
| EnaB-gsp2*           | CGGGCTTATCATCTCAGTTGTCAACCG<br>GTCCCTCAAACAATGCTCT              | riboB <sup>Af</sup> cassette                                    | This work |
| EnaB-gsp3*           | CTAAGCGAGGGAAAGCAGACGGTCTG<br>AGAGGAGGCACTGATGCG                | riboB <sup>Af</sup> /gfp::pyrG <sup>Af</sup><br>cassette        | This work |
| EnaB-gsp6*           | GAGGTAAGCAGGGCCCTCAGGATGC<br>CGGAGCTGGTGCAGGCGCTGGAGCC          | gfp::pyrG <sup>Af</sup> cassette                                | This work |
| EnaC-gsp1            | GGAAAGAGTGCGGGGC                                                | EnaC 5' UTR (enaC-<br>PP1)                                      | This work |
| EnaC-gsp2            | CATTCAATTGGAGTGGAGGTG                                           | EnaC 5' UTR (enaC-<br>PP2)                                      | This work |
| EnaC-gsp3            | TAGGGAACGGATGTTACTTCCG                                          | EnaC 3' UTR                                                     | This work |
| EnaC-gsp4            | CGCCGAGATCTCCCG                                                 | EnaC 3' UTR                                                     | This work |
| EnaC-gsp2*           | CACCTCCACTCCAATTGAATGCGTGGA<br>GTTACCAGTGATTGACCAGG             | riboB <sup>Af</sup> /pyrG <sup>Af</sup> cassette<br>(enaC-SMP1) | This work |
| EnaC-gsp3*           | CGGAAGTAACATCCGTTCCCTAGTCTG<br>AGAGGAGGCACTGATGCG               | riboB <sup>Af</sup> /pyrG <sup>Af</sup> cassette<br>(enaC-SMP2) | This work |
| RiboAnid<br>term rev | CCTAGCAGTGGTTGAATAGT                                            | <i>A. nidulans</i> AN0670.2<br>Amplification                    | This work |
| RiboAnid<br>prom fw  | GATAAGTGTGGTGGAAAGTG                                            | <i>A. nidulans</i> AN0670.2<br>Amplification                    | This work |
| EnaA-<br>sense       | CCTAGGCGTTGAAATCTCCC                                            | Meiotic recombination<br>confirmation                           | This work |
| EnaA-antis           | GCTCGAAGGTGCGGG                                                 | Meiotic recombination<br>confirmation                           | This work |

|             |                                 |                                                                               |              |
|-------------|---------------------------------|-------------------------------------------------------------------------------|--------------|
| EnaB-sense  | GGCTTGACCTTCGAATCTGC            | Meiotic recombination confirmation                                            | This work    |
| EnaB-antis  | CTTACCAACAGGCCACACTCC           | Meiotic recombination confirmation                                            | This work    |
| EnaC-sense  | CGCTCCTCCTGCAATCC               | Meiotic recombination confirmation                                            | This work    |
| EnaC-antis  | CGAGCGTGTAGGCAGAGG              | Meiotic recombination confirmation                                            | This work    |
| An6642 fw   | TCAACGTCGGAACACCTCTT            | <i>enaA</i> forward primer for probe                                          | <sup>7</sup> |
| An6642 rev  | TTGACACCGTCACCAGTCAT A          | <i>enaA</i> reverse primer for probe                                          | <sup>7</sup> |
| An1628 fw   | TCGTCGTTGCAGGTGCTGAT            | <i>enaB</i> forward primer for probe                                          | <sup>7</sup> |
| An1628 rev  | TATTGGTCACCGCTCCAAGG            | <i>enaB</i> reverse primer for probe                                          | <sup>7</sup> |
| An10982 fw  | AGGACATCCTCTCGCTACAG            | <i>enaC</i> forward primer for probe                                          | <sup>7</sup> |
| An10982 rev | TCCTTCTCCAGCCAGTCTCT            | <i>enaC</i> reverse primer for probe                                          | <sup>7</sup> |
| msnA fw     | CGACCATCATCTAATGTGAGTGC         | <i>msnA</i> forward primer for probe                                          | This work    |
| msnA rev    | GAGACCAGTGTGGATGTCGAAGC         | <i>msnA</i> reverse primer for probe                                          | This work    |
| EnaAup      | CGGAATTCATGGGAGAGGAGACCGAA<br>C | <i>enaA</i> forward primer with EcoRI site for <i>gpdA::enaA</i> construction | This work    |
| EnaAdown    | CGGAATTCTCAAACGATATTCTGTTCC     | <i>enaA</i> reverse primer with EcoRI site for <i>gpdA::enaA</i> construction | This work    |

**Supplementary Table 3. List of plasmids used in this work**

| Plasmid ID<br>Madrid's collection | Main features                                                                                                                                                  | Reference           |
|-----------------------------------|----------------------------------------------------------------------------------------------------------------------------------------------------------------|---------------------|
| p1439                             | Plasmid pFNO3 containing the insert $GA_5$ -GFP- <i>pyrG<sup>Af</sup></i>                                                                                      | <sup>8</sup>        |
| p1547                             | pBluescriptSK(+) derivative containing <i>A fumigatus pyroA</i> gene                                                                                           | Gift from B. Oakley |
| p1548                             | pBluescriptSK(+) derivative containing <i>A fumigatus riboB</i> gene                                                                                           | Gift from B. Oakley |
| p1660                             | Expression vector, harbouring <i>gpdA</i> mini promoter, used for moderate expression of target genes.<br>Directed integration to <i>pyroA4</i> mutant allele. | <sup>9</sup>        |

## References

1. Palmgren, M.G. & Nissen, P. P-type ATPases. *Annu. Rev. Biophys.* **40**, 243-266 (2011).
2. Kumar, S., Stecher, G., & Tamura, K. MEGA7: Molecular Evolutionary Genetics Analysis Version 7.0 for Bigger Datasets. *Mol Biol. Evol.* **33**, 1870-1874 (2016).
3. Markina-Iñarrairaegui, A., Pantazopoulou, A., Espeso, E.A., & Peñalva, M.A. The *Aspergillus nidulans* peripheral ER: disorganization by ER stress and persistence during mitosis. *PLoS. One.* **8**, e67154 (2013).
4. Nayak, T., *et al.* A versatile and efficient gene-targeting system for *Aspergillus nidulans*. *Genetics* **172**, 1557-1566 (2006).
5. Markina-Iñarrairaegui, A., *et al.* Nuclear transporters in a multinucleated organism: functional and localization analyses in *Aspergillus nidulans*. *Mol. Biol. Cell* **22**, 3874-3886 (2011).
6. Findon, H., *et al.* Analysis of a novel calcium auxotrophy in *Aspergillus nidulans*. *Fungal. Genet. Biol.* **47**, 647-655 (2010).
7. Spielvogel, A., *et al.* Two zinc finger transcription factors, CrzA and SltA, are involved in cation homeostasis and detoxification in *Aspergillus nidulans*. *Biochem. J.* **414**, 419-429 (2008).
8. Yang, L., *et al.* Rapid production of gene replacement constructs and generation of a green fluorescent protein-tagged centromeric marker in *Aspergillus nidulans*. *Eukaryot. Cell* **3**, 1359-1362 (2004).
9. Pantazopoulou, A. & Peñalva, M.A. Organization and dynamics of the *Aspergillus nidulans* Golgi during apical extension and mitosis. *Mol. Biol. Cell* **20**, 4335-4347 (2009).

Full size images for hybridizations of wild type samples filter  
See Figure 3 panel A and legend for lanes information.

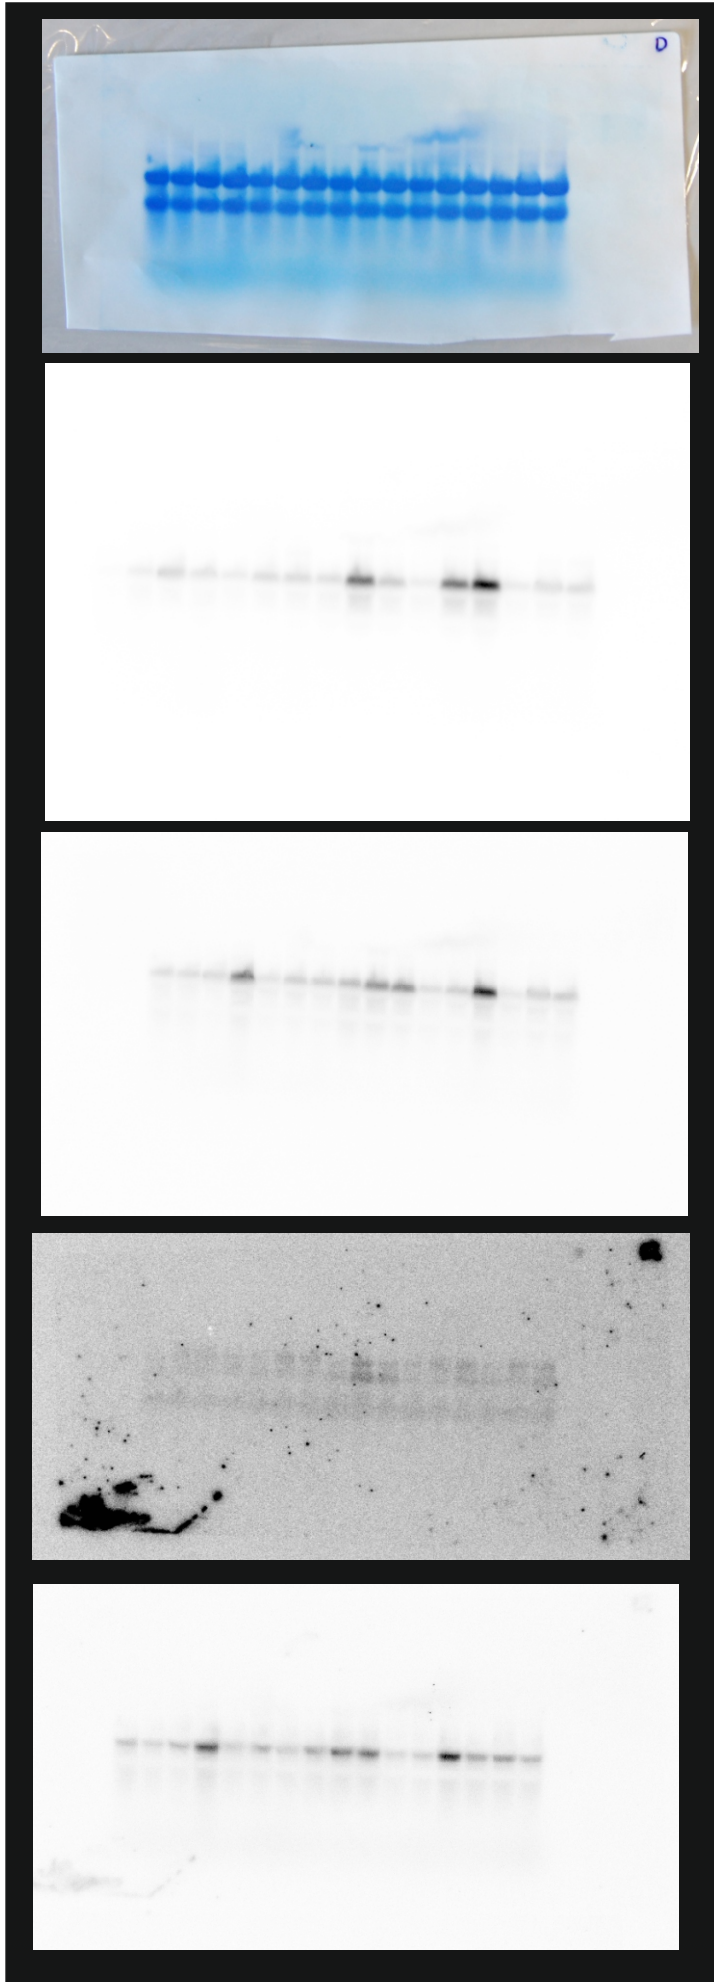

rRNA

probe *enaA*

probe *enaB*

probe *enaC*

probe *msnA*

Full size images for hybridations of *enaA*Δ samples filter  
See Figure 3 panel C and legend for lanes information.

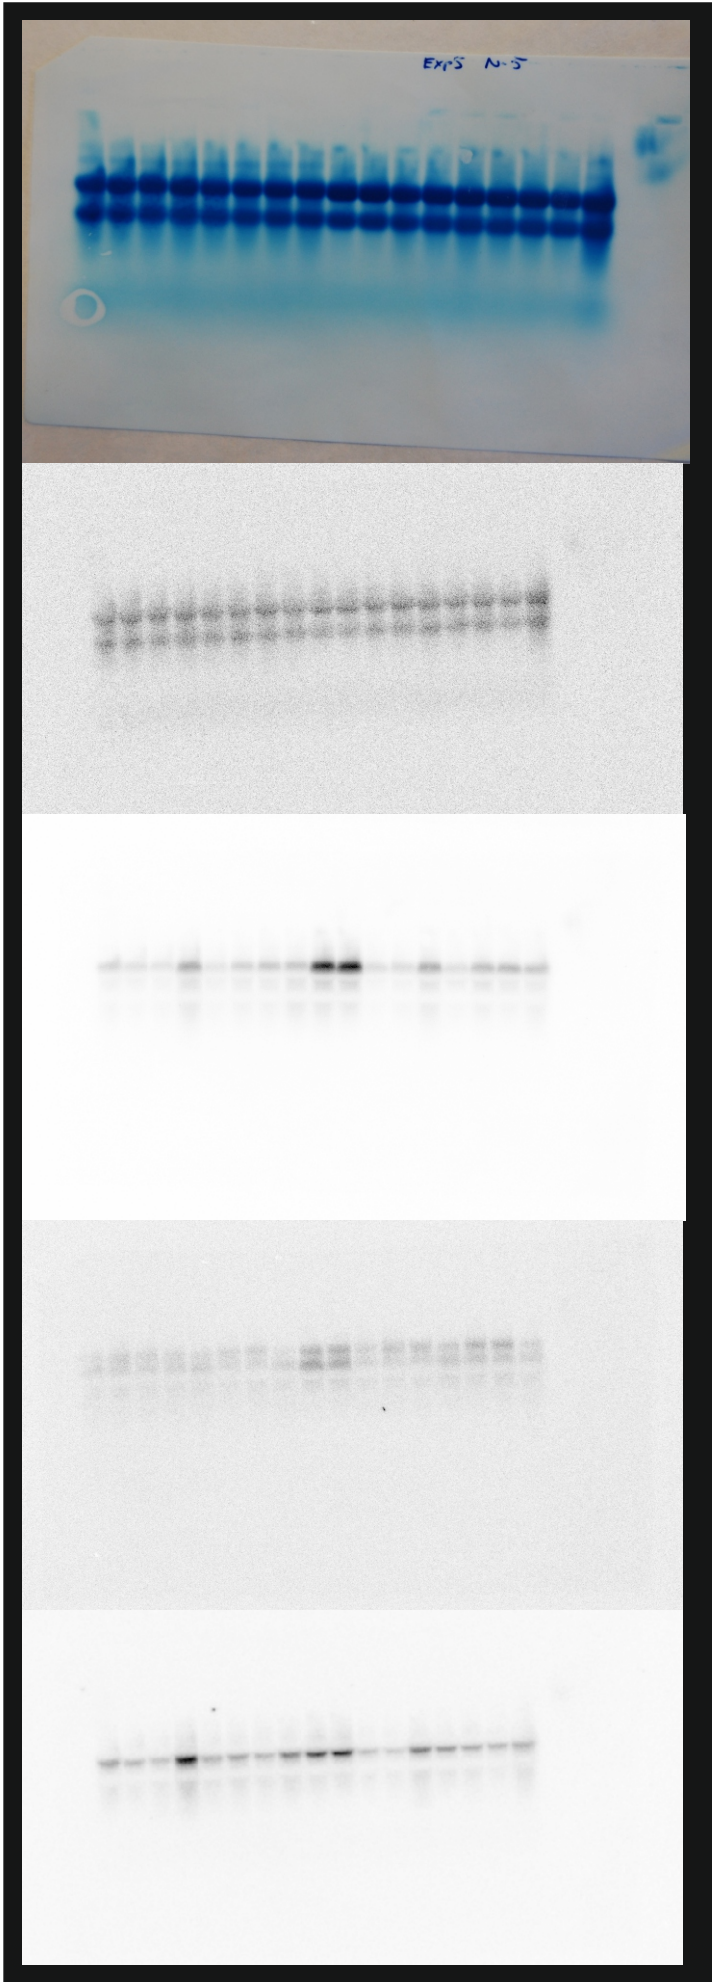

rRNA

probe *enaA*

probe *enaB*

probe *enaC*

probe *msnA*

Full size images for hybridizations of *enaB*Δ samples filter  
See Figure 3 panel D and legend for lanes information.

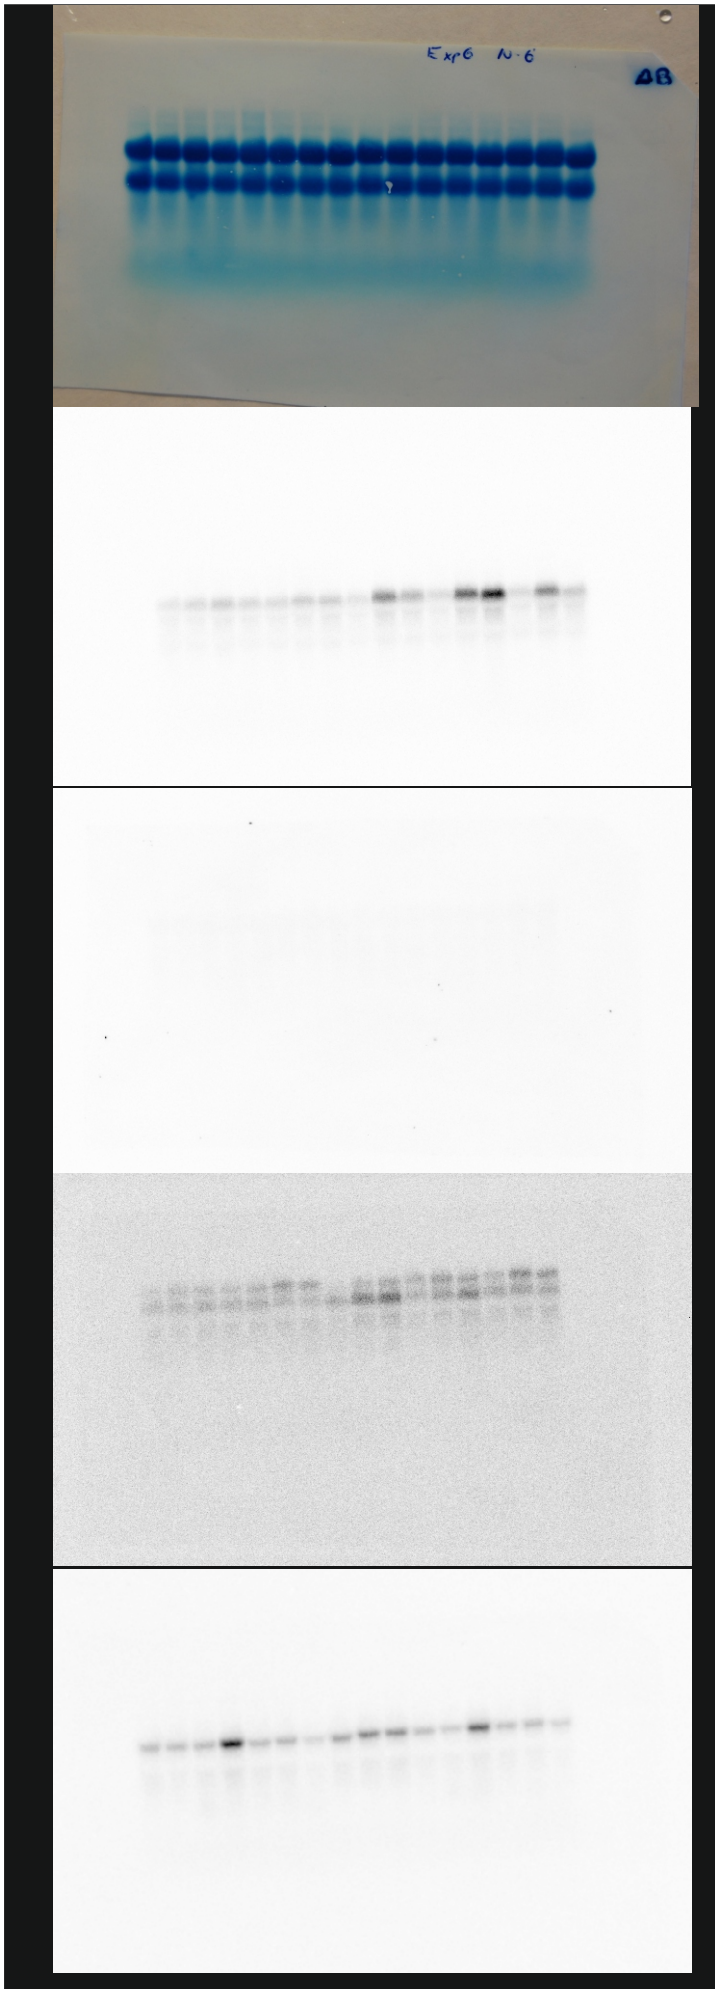

rRNA

probe *enaA*

probe *enaB*

probe *enaC*

probe *msnA*



Full size images for hybridizations of *palH72* samples filter  
See Figure 4 panel B and legend for lanes information.

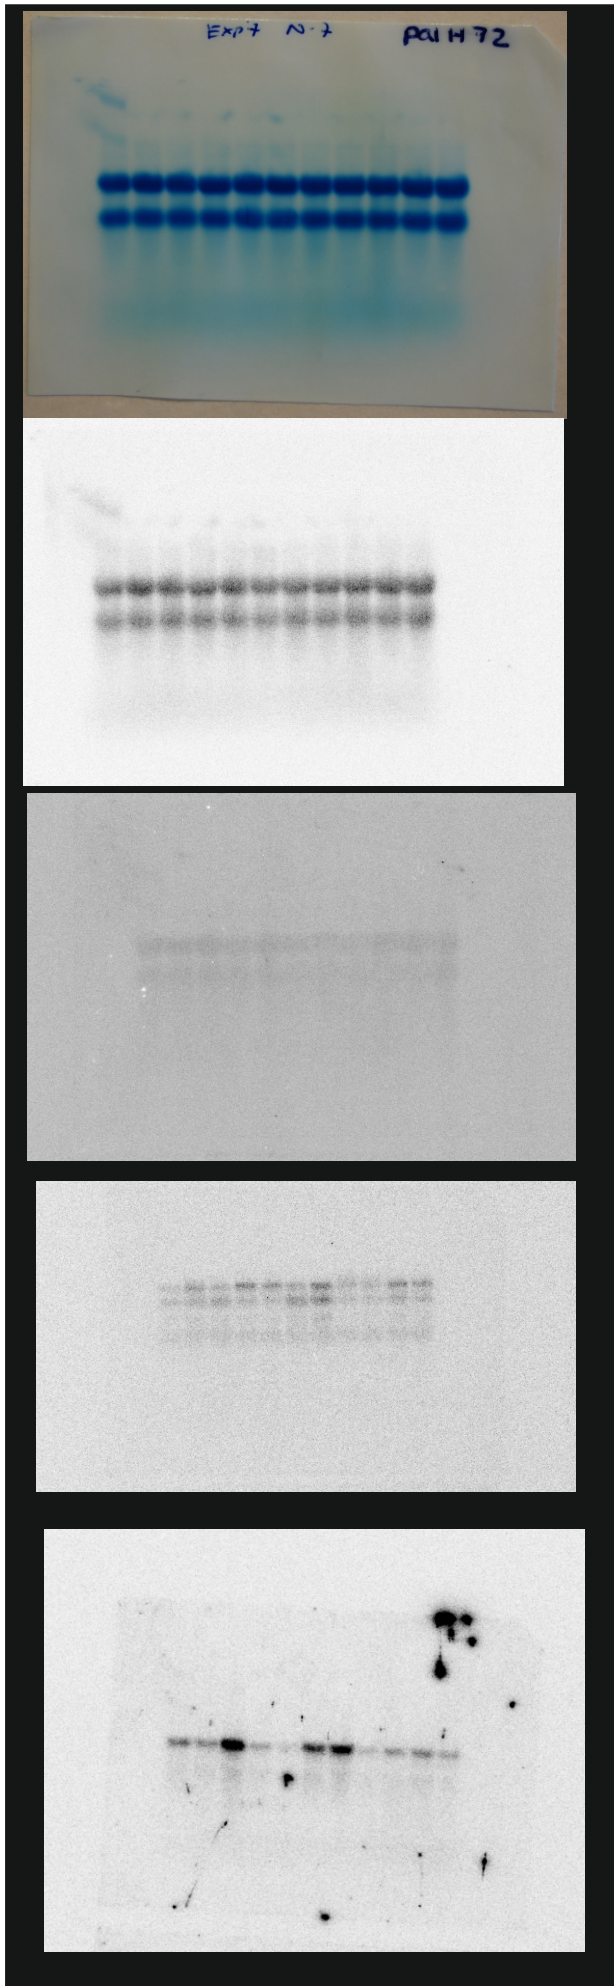

rRNA

probe *enaA*

probe *enaB*

probe *enaC*

probe *msnA*

Full size images for hybridizations of *pacC*<sup>14</sup> samples filter  
See Figure 4 panel C and legend for lanes information.

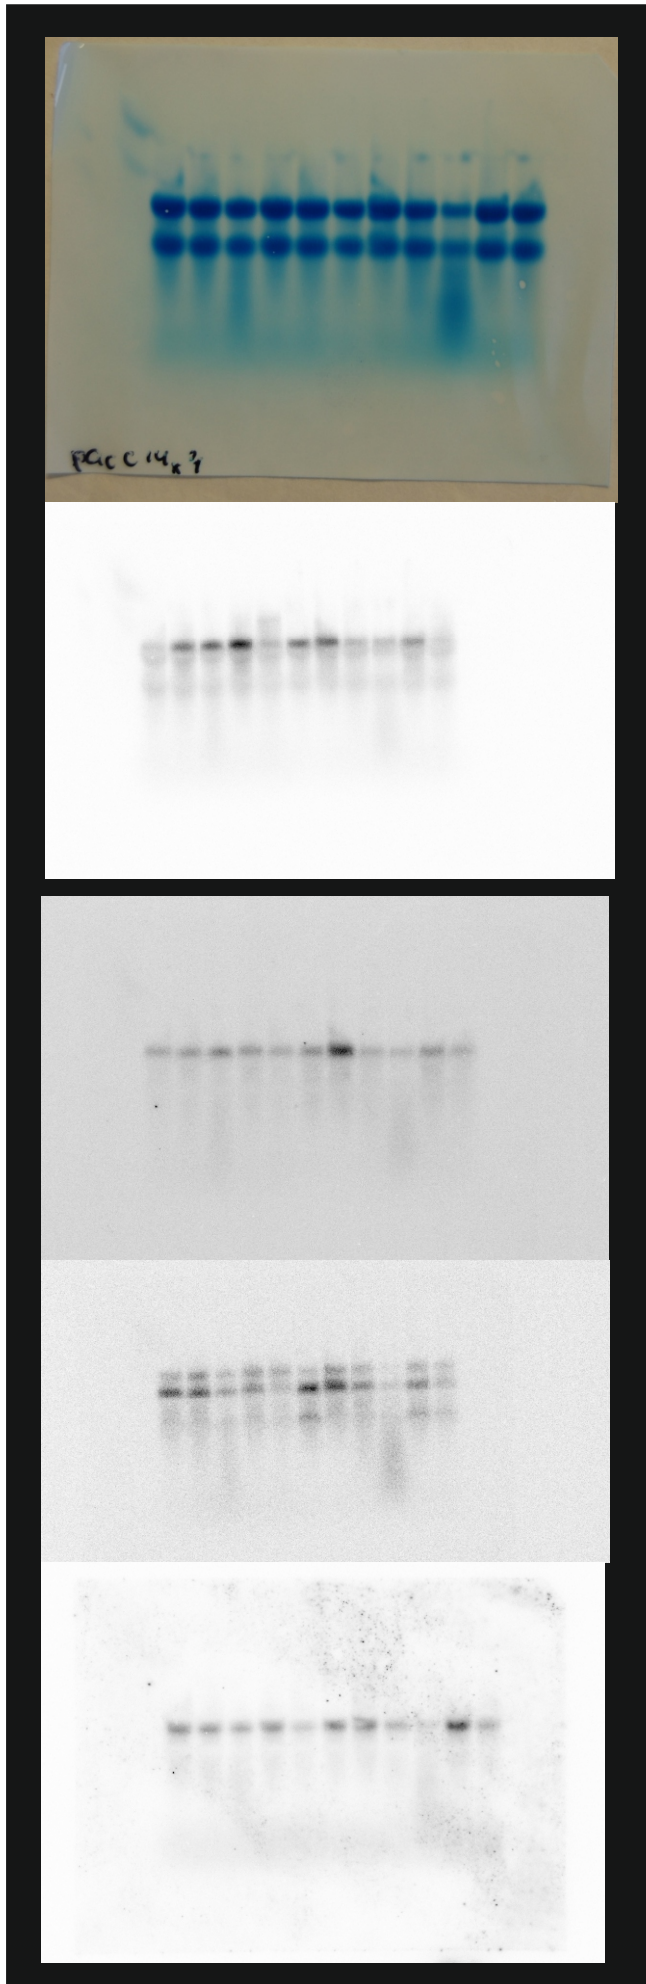

rRNA

probe *enaA*

probe *enaB*

probe *enaC*

probe *msnA*

Full size images for hybridations of *sltA*Δ samples filter  
See Figure 4 panel D and legend for lanes information.

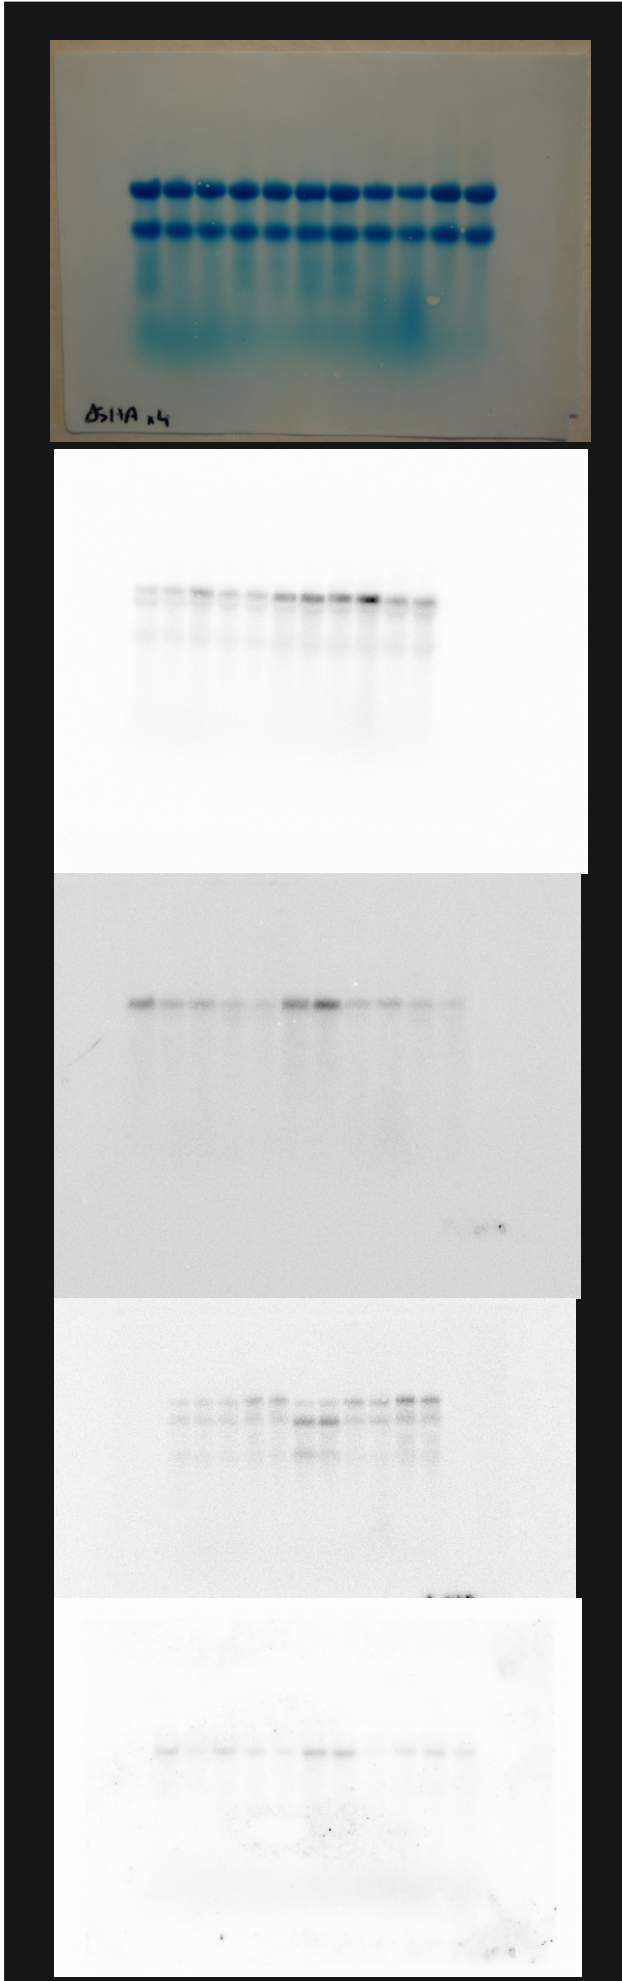

rRNA

probe *enaA*

probe *enaB*

probe *enaC*

probe *msnA*

Full size images for MW markers on filter and immunodetection of GFP and actin in protein extracts from EnaA and EnaB-GFP expressing strains. See Figure 5 panel A and legend for lanes information.

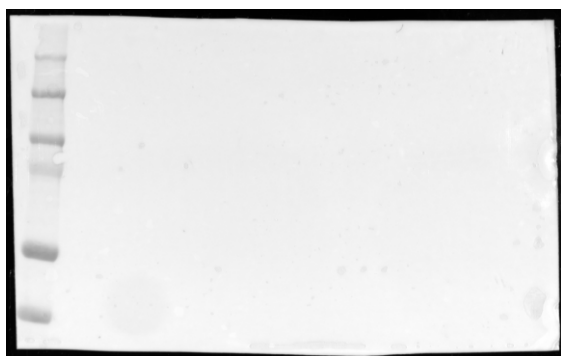

Filter with prestained  
MWs

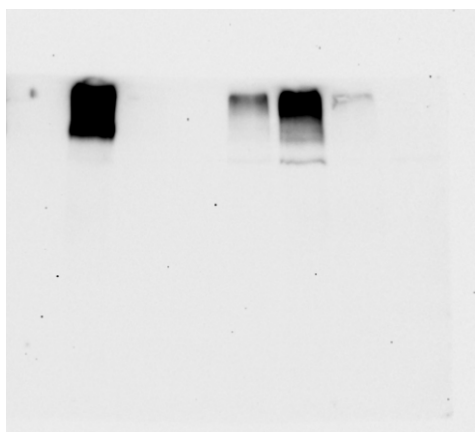

anti-GFP

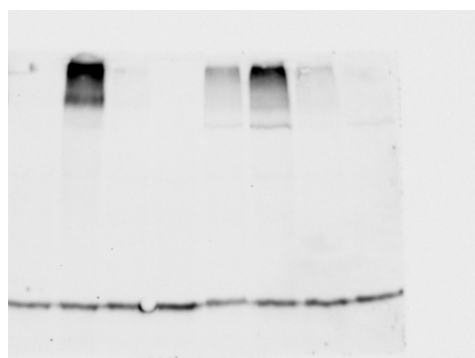

antiGFP +  
anti-actin

Full size images for MW markers on filter and immunodetection of GFP and actin in protein extracts from EnaA and EnaB-GFP expressing strains. See Figure 5 panel B and legend for lanes information.

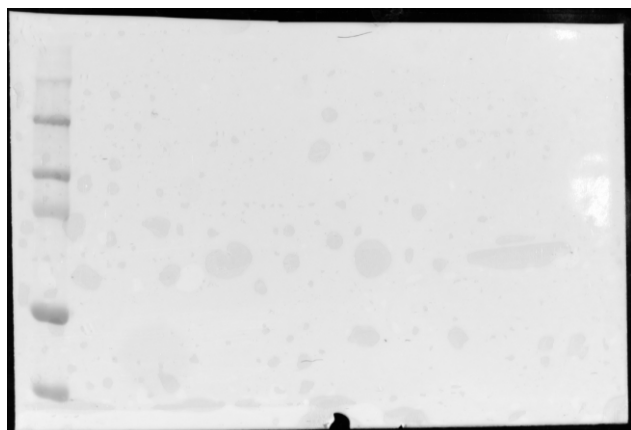

Filter with prestained MWs

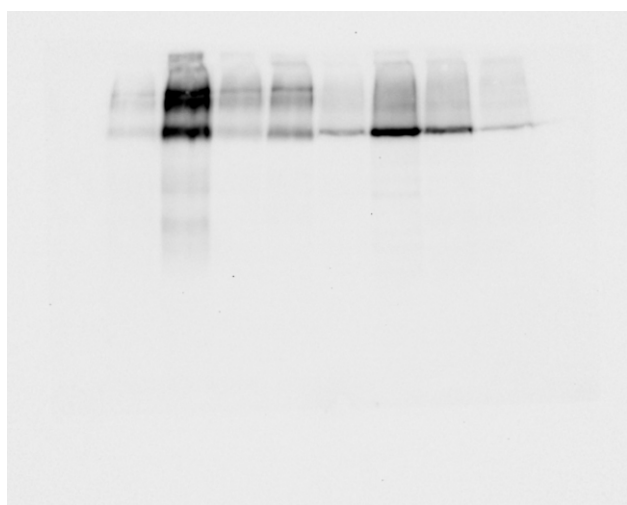

anti-GFP

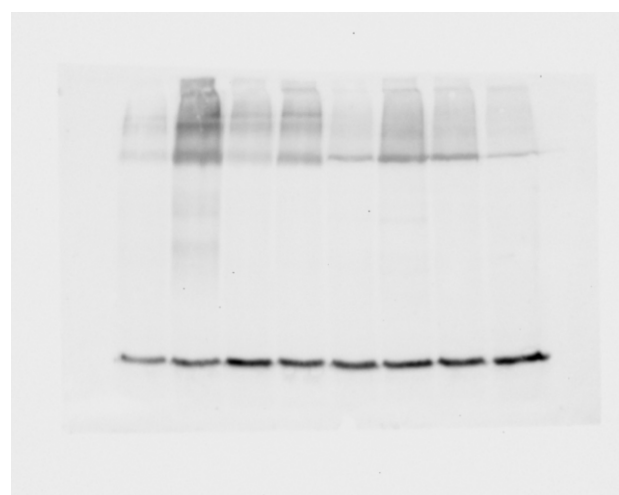

antiGFP +  
anti-actin



Full size images for hybridations of *gpdA* driven *enaA-gfp* chimera  
See Figure 7 panels A and B, and legend for lanes information.

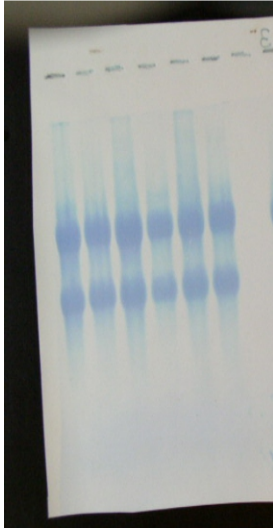

rRNA

Panel  
WT background

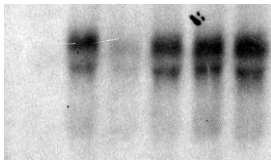

probe *enaA*

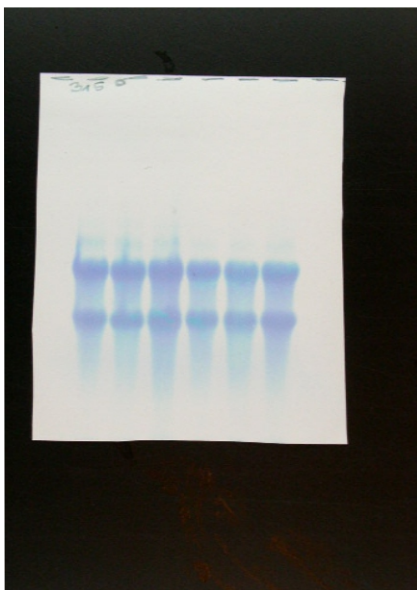

rRNA

Panel B,  
*palA1* background

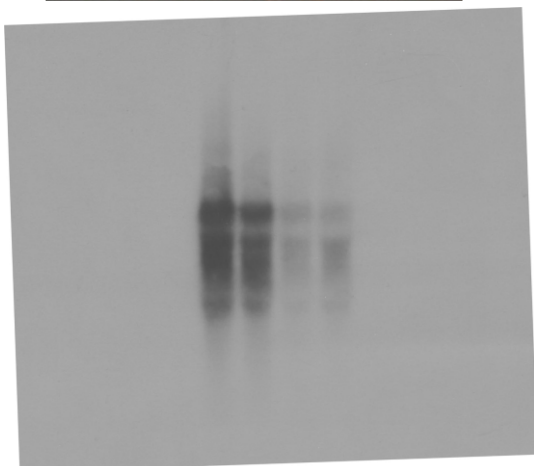

probe *enaA*
